# Supplementary material
Source: HighWire-hosted journal article supplement (https://www.eneuro.org/content/8/5/ENEURO.0208-21.2021)
Supplement: inline-supplementary-material-1 [file inline-supplementary-material-1.pdf]

Figure 4-1: Summary Results of BOLD Activations during the Taste Reactivity Test

| Region                        | Laterality | Extent | $t(84)$ | Coordinates |     |     |
|-------------------------------|------------|--------|---------|-------------|-----|-----|
|                               |            |        |         | x           | y   | z   |
| Postcentral gyrus             | L          | 532    | 5.19    | -55         | -21 | 36  |
| Insular cortex                | L          | 532    | 4.15    | -49         | -12 | 11  |
| Postcentral gyrus             | R          | 327    | 4.96    | 63          | -15 | 29  |
| Piriform Cortex /<br>Amygdala | R          | 282    | 4.78    | -22         | -3  | -14 |
| Parahippocampal<br>cortex     | L          | 282    | 4.77    | -13         | -36 | -7  |
| Thalamus                      | L          | 282    | 4.33    | -12         | -30 | -1  |
| Piriform cortex /<br>Amygdala | L          | 149    | 4.73    | 21          | -6  | -14 |
| Parahippocampal<br>cortex     | R          | 149    | 3.72    | 15          | -30 | -7  |

*Note.* Thresholding  $t(84) > 3.19$ ,  $p < 0.001$ , and minimum cluster level simulation extent for multiple comparison correction at  $p < 0.05 = 123$ . The table shows all local maxima separated by more than 20 mm. Coordinates are expressed in the Montreal Neurological Institute (MNI) space in the left-right, anterior-posterior, and inferior-superior dimensions, respectively.
